# Supplementary material for: Using Functional or Structural Magnetic Resonance Images and Personal Characteristic Data to Identify ADHD and Autism
Source: PubMed Central journal article supplement (PMC5193362; doi:10.1371/journal.pone.0166934), 2016-12-28
Supplement: pone.0166934.s004.pdf [file pone.0166934.s004.pdf]

**S1 Table. Results for bADHD-200, personal characteristic data.** See S1 Appendix for details.

| Learner, L | Number of features, $ \text{FS}^*(L) $ | Training Accuracy, $\text{Eacc}(L, D_{\text{train}}, \text{FS}^*(L))$ | Range | Test Accuracy, $\text{acc}(L^*, D_{\text{test}}, \text{FS}^*(L^*))$ |
|------------|----------------------------------------|-----------------------------------------------------------------------|-------|---------------------------------------------------------------------|
| RBF-2      | 1                                      | 48.9%                                                                 | 2.5%  | 45.6%                                                               |
| RBF-3      | 1                                      | 48.9%                                                                 | 2.5%  |                                                                     |
| RBF-6      | 1                                      | 48.1%                                                                 | 2.5%  |                                                                     |
| RBF-8      | 2                                      | 48.1%                                                                 | 1.1%  |                                                                     |
| RBF-9      | 2                                      | 48.1%                                                                 | 5.2%  |                                                                     |
