# Supplementary material for: Using Functional or Structural Magnetic Resonance Images and Personal Characteristic Data to Identify ADHD and Autism
Source: PubMed Central journal article supplement (PMC5193362; doi:10.1371/journal.pone.0166934), 2016-12-28
Supplement: pone.0166934.s006.pdf [file pone.0166934.s006.pdf]

**S3 Table. Results for bADHD-200, functional image data.** See S1 Appendix for details.

| Learner, L | Number of features, $ \text{FS}^*(L) $ | Training Accuracy, $\text{Eacc}(L, D_{\text{train}}, \text{FS}^*(L))$ | Range | Test Accuracy, $\text{acc}(L^*, D_{\text{test}}, \text{FS}^*(L^*))$ |
|------------|----------------------------------------|-----------------------------------------------------------------------|-------|---------------------------------------------------------------------|
| RBF-9      | 260                                    | 70.0%                                                                 | 11.1% |                                                                     |
| RBF-8      | 210                                    | 70.0%                                                                 | 13.8% |                                                                     |
| RBF-4      | 53                                     | 69.7%                                                                 | 13.8% |                                                                     |
| RBF-6      | 252                                    | 69.7%                                                                 | 8.3%  |                                                                     |
| RBF-7      | 265                                    | 69.7%                                                                 | 6.9%  | 63.3%                                                               |
