# Supplementary material for: Using Functional or Structural Magnetic Resonance Images and Personal Characteristic Data to Identify ADHD and Autism
Source: PubMed Central journal article supplement (PMC5193362; doi:10.1371/journal.pone.0166934), 2016-12-28
Supplement: pone.0166934.s007.pdf [file pone.0166934.s007.pdf]

**S4 Table. Results for bABIDE, functional image data.** See S1 Appendix for details.

| Learner, L | Number of features, $ \text{FS}^*(L) $ | Training Accuracy, $\text{Eacc}(L, D_{\text{train}}, \text{FS}^*(L))$ | Range | Test Accuracy, $\text{acc}(L^*, D_{\text{test}}, \text{FS}^*(L^*))$ |
|------------|----------------------------------------|-----------------------------------------------------------------------|-------|---------------------------------------------------------------------|
| RBF-4      | 65                                     | 60.4%                                                                 | 13.3% |                                                                     |
| RBF-6      | 288                                    | 60.1%                                                                 | 17.6% |                                                                     |
| RBF-3      | 18                                     | 59.6%                                                                 | 12.5% |                                                                     |
| RBF-5      | 51                                     | 59.4%                                                                 | 22.2% |                                                                     |
| RBF-9      | 360                                    | 59.4%                                                                 | 9.9%  | 63.0%                                                               |
