# Supplementary material for: Using Functional or Structural Magnetic Resonance Images and Personal Characteristic Data to Identify ADHD and Autism
Source: PubMed Central journal article supplement (PMC5193362; doi:10.1371/journal.pone.0166934), 2016-12-28
Supplement: pone.0166934.s008.pdf [file pone.0166934.s008.pdf]

**S5 Table. Results for bADHD-200, structural image data.** See S1 Appendix for details.

| Learner, L | Number of features, $ \text{FS}^*(L) $ | Training Accuracy, $\text{Eacc}(L, D_{\text{train}}, \text{FS}^*(L))$ | Range | Test Accuracy, $\text{acc}(L^*, D_{\text{test}}, \text{FS}^*(L^*))$ |
|------------|----------------------------------------|-----------------------------------------------------------------------|-------|---------------------------------------------------------------------|
| RBF-4      | 97                                     | 66.3%                                                                 | 15.8% |                                                                     |
| RBF-9      | 188                                    | 66.3%                                                                 | 13.8% |                                                                     |
| RBF-7      | 158                                    | 66.1%                                                                 | 11.1% |                                                                     |
| RBF-5      | 217                                    | 65.8%                                                                 | 11.1% | 63.3%                                                               |
| RBF-8      | 170                                    | 65.8%                                                                 | 15.2% |                                                                     |
