# Supplementary material for: Using Functional or Structural Magnetic Resonance Images and Personal Characteristic Data to Identify ADHD and Autism
Source: PubMed Central journal article supplement (PMC5193362; doi:10.1371/journal.pone.0166934), 2016-12-28
Supplement: pone.0166934.s009.pdf [file pone.0166934.s009.pdf]

**S6 Table. Results for bABIDE, structural image data.** See S1 Appendix for details.

| Learner, L | Number of features, $ \text{FS}^*(L) $ | Training Accuracy, $\text{Eacc}(L, D_{\text{train}}, \text{FS}^*(L))$ | Range | Test Accuracy, $\text{acc}(L^*, D_{\text{test}}, \text{FS}^*(L^*))$ |
|------------|----------------------------------------|-----------------------------------------------------------------------|-------|---------------------------------------------------------------------|
| RBF-9      | 311                                    | 59.1%                                                                 | 6.0%  |                                                                     |
| RBF-6      | 133                                    | 59.1%                                                                 | 8.0%  |                                                                     |
| RBF-5      | 170                                    | 58.7%                                                                 | 3.7%  | 60.9%                                                               |
| RBF-3      | 61                                     | 58.7%                                                                 | 12.3% |                                                                     |
| RBF-7      | 166                                    | 58.5%                                                                 | 9.4%  |                                                                     |
