# Supplementary material for: Using Functional or Structural Magnetic Resonance Images and Personal Characteristic Data to Identify ADHD and Autism
Source: PubMed Central journal article supplement (PMC5193362; doi:10.1371/journal.pone.0166934), 2016-12-28
Supplement: pone.0166934.s010.pdf [file pone.0166934.s010.pdf]

**S7 Table. Block regions for ADHD-200 structural image data. Part 1**

| Region                                             | X   | Y   | Z   |
|----------------------------------------------------|-----|-----|-----|
| Left Cerebellum Crus II                            | 3   | -95 | -33 |
| Vermis Cerebellum Crus I                           | 51  | -95 | -33 |
| Left Cerebellum Crus I                             | -29 | -79 | -33 |
| Left Inferior Temporal Gyrus temporooccipital part | -61 | -63 | -33 |
| Left Cerebellum Crus I                             | -29 | -63 | -33 |
| Right Cerebellum Crus I                            | 51  | -63 | -33 |
| Brain-Stem                                         | 3   | -31 | -33 |
| Brain-Stem                                         | 3   | -15 | -33 |
| Right Parahippocampal Gyrus anterior division      | 19  | -15 | -33 |
| Right Inferior Temporal Gyrus posterior division   | 51  | -15 | -33 |
| Left Temporal Pole                                 | -61 | 17  | -33 |
| Left Temporal Pole                                 | -45 | 33  | -33 |
| Left Temporal Pole                                 | -61 | 49  | -33 |
| Right Temporal Pole                                | 51  | 49  | -33 |
| Left Lateral Occipital Cortex inferior division    | -61 | -95 | -17 |
| Left Lateral Occipital Cortex inferior division    | -45 | -95 | -17 |
| Left Occipital Pole                                | -13 | -95 | -17 |
| Right Occipital Pole                               | 3   | -95 | -17 |
| Left Cerebellum Crus I                             | -29 | -79 | -17 |
| Left Cerebellum Crus I                             | -13 | -79 | -17 |
| Right Cerebellum Crus I                            | 35  | -79 | -17 |
| Right Lateral Occipital Cortex inferior division   | 51  | -79 | -17 |
| Left Temporal Occipital Fusiform Cortex            | -45 | -63 | -17 |
| Right Lateral Occipital Cortex inferior division   | 51  | -63 | -17 |
| Left Inferior Temporal Gyrus temporooccipital part | -61 | -47 | -17 |
| Left Middle Temporal Gyrus posterior division      | -61 | -15 | -17 |
| Left Inferior Frontal Gyrus pars triangularis      | -61 | 49  | -17 |
| Left Frontal Pole                                  | -45 | 49  | -17 |
| Left Occipital Pole                                | -29 | -95 | -1  |
| Right Lateral Occipital Cortex inferior division   | 51  | -95 | -1  |
| Left Occipital Fusiform Gyrus                      | -29 | -79 | -1  |
| Left Lateral Occipital Cortex inferior division    | -61 | -63 | -1  |
| Right Lateral Occipital Cortex inferior division   | 51  | -63 | -1  |
| Left Inferior Frontal Gyrus pars opercularis       | -61 | 17  | -1  |
| Left Inferior Frontal Gyrus pars triangularis      | -61 | 49  | -1  |

Part 2

| Region                                           | X   | Y   | Z  |
|--------------------------------------------------|-----|-----|----|
| Left Lateral Occipital Cortex inferior division  | -61 | -95 | 15 |
| Left Lateral Occipital Cortex inferior division  | -45 | -95 | 15 |
| Left Occipital Pole                              | -29 | -95 | 15 |
| Right Occipital Pole                             | 3   | -95 | 15 |
| Right Occipital Pole                             | 35  | -95 | 15 |
| Right Lateral Occipital Cortex inferior division | 51  | -95 | 15 |
| Right Lateral Occipital Cortex superior division | 51  | -79 | 15 |
| Right Lateral Occipital Cortex inferior division | 51  | -63 | 15 |
| Left Cerebral White Matter                       | -29 | -47 | 15 |
| Left Planum Temporale                            | -61 | -31 | 15 |
| Right Cerebral White Matter                      | 3   | -31 | 15 |
| Left Thalamus                                    | -13 | -15 | 15 |
| Right Cingulate Gyrus anterior division          | 3   | 33  | 15 |
| Left Frontal Pole                                | -29 | 49  | 15 |
| Right Frontal Pole                               | 35  | 49  | 15 |
| Right Lateral Occipital Cortex superior division | 51  | -95 | 31 |
| Left Lateral Occipital Cortex superior division  | -45 | -79 | 31 |
| Left Cuneal Cortex                               | -13 | -79 | 31 |
| Right Cuneal Cortex                              | 3   | -79 | 31 |
| Right Lateral Occipital Cortex superior division | 35  | -79 | 31 |
| Right Lateral Occipital Cortex superior division | 51  | -79 | 31 |
| Left Lateral Occipital Cortex superior division  | -45 | -63 | 31 |
| Left Superior Parietal Lobule                    | -29 | -47 | 31 |
| Left Cingulate Gyrus posterior division          | -13 | -47 | 31 |
| Left Cerebral White Matter                       | -13 | -31 | 31 |
| Right Cingulate Gyrus posterior division         | 3   | -31 | 31 |
| Right Cerebral White Matter                      | 35  | -31 | 31 |
| Left Cerebral White Matter                       | -13 | -15 | 31 |
| Right Cerebral White Matter                      | 19  | 1   | 31 |
| Right Cerebral White Matter                      | 19  | 17  | 31 |
| Left Inferior Frontal Gyrus pars triangularis    | -61 | 33  | 31 |
| Left Middle Frontal Gyrus                        | -45 | 33  | 31 |
| Left Inferior Frontal Gyrus pars triangularis    | -61 | 49  | 31 |
| Left Inferior Frontal Gyrus pars triangularis    | -45 | 49  | 31 |

Part 3

| Region                                           | X   | Y   | Z  |
|--------------------------------------------------|-----|-----|----|
| Left Lateral Occipital Cortex superior division  | -61 | -95 | 47 |
| Left Lateral Occipital Cortex superior division  | -29 | -79 | 47 |
| Right Lateral Occipital Cortex superior division | 19  | -79 | 47 |
| Left Lateral Occipital Cortex superior division  | -45 | -63 | 47 |
| Left Postcentral Gyrus                           | -61 | -15 | 47 |
| Right Cingulate Gyrus posterior division         | 3   | -15 | 47 |
| Right Cerebral White Matter                      | 19  | -15 | 47 |
| Right Juxtapositional Lobule Cortex              | 3   | 1   | 47 |
| Right Superior Frontal Gyrus                     | 19  | 1   | 47 |
| Left Middle Frontal Gyrus                        | -29 | 17  | 47 |
| Right Middle Frontal Gyrus                       | 35  | 17  | 47 |
| Left Middle Frontal Gyrus                        | -45 | 33  | 47 |
| Right Middle Frontal Gyrus                       | 35  | 33  | 47 |
| Right Middle Frontal Gyrus                       | 51  | 33  | 47 |
| Left Middle Frontal Gyrus                        | -61 | 49  | 47 |
| Right Frontal Pole                               | 19  | 49  | 47 |
| Right Middle Frontal Gyrus                       | 35  | 49  | 47 |
| Left Lateral Occipital Cortex superior division  | -61 | -95 | 63 |
| Right Lateral Occipital Cortex superior division | 19  | -95 | 63 |
| Left Lateral Occipital Cortex superior division  | -61 | -79 | 63 |
| Left Lateral Occipital Cortex superior division  | -29 | -79 | 63 |
| Right Lateral Occipital Cortex superior division | 51  | -79 | 63 |
| Left Supramarginal Gyrus posterior division      | -61 | -63 | 63 |
| Right Supramarginal Gyrus posterior division     | 51  | -47 | 63 |
| Left Postcentral Gyrus                           | -45 | -31 | 63 |
| Right Postcentral Gyrus                          | 51  | -31 | 63 |
| Right Middle Frontal Gyrus                       | 35  | 17  | 63 |
| Right Middle Frontal Gyrus                       | 51  | 17  | 63 |
| Left Middle Frontal Gyrus                        | -45 | 33  | 63 |
| Right Superior Frontal Gyrus                     | 19  | 33  | 63 |
| Right Superior Frontal Gyrus                     | 35  | 33  | 63 |
| Right Superior Frontal Gyrus                     | 19  | 49  | 63 |
| Right Middle Frontal Gyrus                       | 35  | 49  | 63 |
| Right Middle Frontal Gyrus                       | 51  | 49  | 63 |
