# Supplementary material for: Using Functional or Structural Magnetic Resonance Images and Personal Characteristic Data to Identify ADHD and Autism
Source: PubMed Central journal article supplement (PMC5193362; doi:10.1371/journal.pone.0166934), 2016-12-28
Supplement: pone.0166934.s011.pdf [file pone.0166934.s011.pdf]

**S8 Table. Block regions for ADHD-200 functional image data. Part 1**

| Region                                             | X   | Y   | Z   |
|----------------------------------------------------|-----|-----|-----|
| Right Cerebellum Crus I                            | -29 | -95 | -33 |
| Left Cerebellum Crus I                             | -61 | -79 | -33 |
| Left Cerebellum VI                                 | -13 | -63 | -33 |
| Vermis Cerebellum VIIIa                            | 3   | -63 | -33 |
| Left Cerebellum VI                                 | -29 | -47 | -33 |
| Right Cerebellum VIIIb                             | -13 | -47 | -33 |
| Vermis Cerebellum IX                               | 19  | -47 | -33 |
| Right Cerebellum VI                                | 35  | -47 | -33 |
| Left Inferior Temporal Gyrus posterior division    | -61 | -31 | -33 |
| Left Cerebellum V                                  | -29 | -31 | -33 |
| Brain-Stem                                         | -13 | -31 | -33 |
| Right Cerebellum I-IV                              | 19  | -31 | -33 |
| Left Parahippocampal Gyrus anterior division       | -29 | -15 | -33 |
| Brain-Stem                                         | -13 | -15 | -33 |
| Left Parahippocampal Gyrus anterior division       | -29 | 1   | -33 |
| Left Subcallosal Cortex                            | -13 | 17  | -33 |
| Left Frontal Medial Cortex                         | -29 | 49  | -33 |
| Left Lateral Occipital Cortex inferior division    | -45 | -79 | -17 |
| Vermis Cerebellum VI                               | 3   | -79 | -17 |
| Left Cerebellum VI                                 | -29 | -63 | -17 |
| Right Cerebellum V                                 | 3   | -63 | -17 |
| Left Inferior Temporal Gyrus temporooccipital part | -45 | -47 | -17 |
| Left Parahippocampal Gyrus posterior division      | -29 | -31 | -17 |
| Right Temporal Fusiform Cortex posterior division  | 35  | -31 | -17 |
| Left Superior Temporal Gyrus anterior division     | -45 | -15 | -17 |
| Right Middle Temporal Gyrus posterior division     | 51  | -15 | -17 |
| Left Planum Polare                                 | -45 | 1   | -17 |
| Left Parahippocampal Gyrus anterior division       | -29 | 1   | -17 |
| Left Cerebral Cortex                               | -13 | 1   | -17 |
| Right Parahippocampal Gyrus anterior division      | 19  | 1   | -17 |
| Right Temporal Pole                                | 51  | 17  | -17 |
| Right Lingual Gyrus                                | 3   | -79 | -1  |
| Right Lateral Occipital Cortex inferior division   | 51  | -79 | -1  |
| Left Lingual Gyrus                                 | -29 | -63 | -1  |
| Right Lingual Gyrus                                | 19  | -63 | -1  |
| Left Superior Temporal Gyrus posterior division    | -45 | -31 | -1  |
| Left Cerebral White Matter                         | -29 | -31 | -1  |
| Right Insular Cortex                               | 35  | -15 | -1  |
| Right Superior Temporal Gyrus posterior division   | 51  | -15 | -1  |
| Left Pallidum                                      | -13 | 1   | -1  |
| Right Cerebral White Matter                        | 3   | 1   | -1  |
| Right Subcallosal Cortex                           | 3   | 17  | -1  |
| Right Cerebral White Matter                        | 19  | 17  | -1  |
| Left Cerebral White Matter                         | -13 | 33  | -1  |

Part 2

| Region                                           | X   | Y   | Z  |
|--------------------------------------------------|-----|-----|----|
| Right Cingulate Gyrus anterior division          | 3   | 33  | -1 |
| Left Frontal Pole                                | -29 | 49  | -1 |
| Left Paracingulate Gyrus                         | -13 | 49  | -1 |
| Right Intracalcarine Cortex                      | 19  | -79 | 15 |
| Right Lateral Occipital Cortex superior division | 51  | -79 | 15 |
| Left Cerebral White Matter                       | -29 | -63 | 15 |
| Right Supracalcarine Cortex                      | 19  | -63 | 15 |
| Right Lateral Occipital Cortex inferior division | 51  | -63 | 15 |
| Left Supramarginal Gyrus posterior division      | -45 | -47 | 15 |
| Left Cerebral White Matter                       | -29 | -47 | 15 |
| Left Parietal Operculum Cortex                   | -45 | -31 | 15 |
| Right Planum Temporale                           | 35  | -31 | 15 |
| Right Planum Temporale                           | 51  | -31 | 15 |
| Right Insular Cortex                             | 35  | -15 | 15 |
| Right Central Opercular Cortex                   | 51  | -15 | 15 |
| Left Central Opercular Cortex                    | -45 | 1   | 15 |
| Left Insular Cortex                              | -29 | 1   | 15 |
| Left Lateral Ventrical                           | -13 | 17  | 15 |
| Left Cingulate Gyrus anterior division           | -13 | 33  | 15 |
| Right Cingulate Gyrus anterior division          | 3   | 33  | 15 |
| Right Frontal Pole                               | 35  | 33  | 15 |
| Left Frontal Pole                                | -45 | 49  | 15 |
| Right Frontal Pole                               | 35  | 49  | 15 |
| Right Lateral Occipital Cortex superior division | 35  | -63 | 31 |
| Left Supramarginal Gyrus anterior division       | -45 | -31 | 31 |
| Right Parietal Operculum Cortex                  | 51  | -31 | 31 |
| Left Postcentral Gyrus                           | -45 | -15 | 31 |
| Left Cerebral White Matter                       | -29 | -15 | 31 |
| Right Cerebral White Matter                      | 35  | -15 | 31 |
| Left Middle Frontal Gyrus                        | -45 | 17  | 31 |
| Left Middle Frontal Gyrus                        | -29 | 17  | 31 |
| Left Middle Frontal Gyrus                        | -29 | 33  | 31 |
| Left Inferior Frontal Gyrus pars triangularis    | -45 | 49  | 31 |
| Left Lateral Occipital Cortex superior division  | -29 | -79 | 47 |
| Right Precuneous Cortex                          | 3   | -63 | 47 |
| Left Supramarginal Gyrus posterior division      | -45 | -47 | 47 |
| Left Precuneous Cortex                           | -13 | -47 | 47 |
| Right Angular Gyrus                              | 51  | -47 | 47 |

Part 3

| Region                                           | X   | Y   | Z  |
|--------------------------------------------------|-----|-----|----|
| Left Postcentral Gyrus                           | -29 | -31 | 47 |
| Right Postcentral Gyrus                          | 35  | -31 | 47 |
| Left Postcentral Gyrus                           | -61 | -15 | 47 |
| Right Precentral Gyrus                           | 35  | -15 | 47 |
| Right Postcentral Gyrus                          | 51  | -15 | 47 |
| Left Middle Frontal Gyrus                        | -61 | 1   | 47 |
| Left Middle Frontal Gyrus                        | -29 | 1   | 47 |
| Right Superior Frontal Gyrus                     | 19  | 17  | 47 |
| Right Middle Frontal Gyrus                       | 51  | 17  | 47 |
| Left Middle Frontal Gyrus                        | -61 | 33  | 47 |
| Right Middle Frontal Gyrus                       | 35  | 33  | 47 |
| Right Middle Frontal Gyrus                       | 51  | 33  | 47 |
| Right Middle Frontal Gyrus                       | 35  | 49  | 47 |
| Right Lateral Occipital Cortex superior division | 19  | -79 | 63 |
| Left Superior Parietal Lobule                    | -45 | -47 | 63 |
| Left Superior Parietal Lobule                    | -29 | -47 | 63 |
| Right Precuneous Cortex                          | 3   | -47 | 63 |
| Left Postcentral Gyrus                           | -45 | -31 | 63 |
| Left Postcentral Gyrus                           | -29 | -31 | 63 |
| Left Precentral Gyrus                            | -13 | -31 | 63 |
| Right Postcentral Gyrus                          | 19  | -31 | 63 |
| Right Postcentral Gyrus                          | 35  | -31 | 63 |
| Left Precentral Gyrus                            | -29 | -15 | 63 |
| Right Precentral Gyrus                           | 35  | -15 | 63 |
| Left Cerebral Cortex                             | -45 | 1   | 63 |
| Left Superior Frontal Gyrus                      | -13 | 1   | 63 |
| Right Superior Frontal Gyrus                     | 19  | 1   | 63 |
| Right Middle Frontal Gyrus                       | 35  | 1   | 63 |
| Right Precentral Gyrus                           | 51  | 1   | 63 |
| Left Superior Frontal Gyrus                      | -13 | 17  | 63 |
| Right Superior Frontal Gyrus                     | 19  | 17  | 63 |
| Right Middle Frontal Gyrus                       | 35  | 17  | 63 |
| Right Middle Frontal Gyrus                       | 51  | 17  | 63 |
| Right Superior Frontal Gyrus                     | 3   | 33  | 63 |
