# Supplementary material for: Using Functional or Structural Magnetic Resonance Images and Personal Characteristic Data to Identify ADHD and Autism
Source: PubMed Central journal article supplement (PMC5193362; doi:10.1371/journal.pone.0166934), 2016-12-28
Supplement: pone.0166934.s012.pdf [file pone.0166934.s012.pdf]

**S9 Table. Block regions for ABIDE structural image data. Part 1**

| Region                                           | X   | Y   | Z   |
|--------------------------------------------------|-----|-----|-----|
| Left Cerebellum Crus II                          | -13 | -95 | -33 |
| Right Cerebellum Crus I                          | 51  | -47 | -33 |
| Brain-Stem                                       | -13 | -31 | -33 |
| Left Temporal Pole                               | -45 | 33  | -33 |
| Left Frontal Medial Cortex                       | -29 | 49  | -33 |
| Left Occipital Pole                              | -29 | -95 | -17 |
| Left Occipital Pole                              | -13 | -95 | -17 |
| Right Occipital Pole                             | 3   | -95 | -17 |
| Right Lateral Occipital Cortex inferior division | 51  | -95 | -17 |
| Right Cerebellum VI                              | 35  | -63 | -17 |
| Left Middle Temporal Gyrus anterior division     | -61 | 1   | -17 |
| Left Frontal Medial Cortex                       | -13 | 33  | -17 |
| Left Occipital Fusiform Gyrus                    | -29 | -79 | -1  |
| Right Lateral Occipital Cortex inferior division | 51  | -79 | -1  |
| Left Inferior Frontal Gyrus pars opercularis     | -61 | 17  | -1  |
| Right Inferior Frontal Gyrus pars opercularis    | 51  | 17  | -1  |
| Left Occipital Pole                              | -13 | -95 | 15  |
| Right Occipital Pole                             | 3   | -95 | 15  |
| Left Lateral Occipital Cortex superior division  | -29 | -79 | 15  |
| Right Lateral Occipital Cortex superior division | 35  | -79 | 15  |
| Left Thalamus                                    | -13 | -15 | 15  |
| Right Cerebral White Matter                      | 19  | -15 | 15  |
| Left Caudate                                     | -13 | 1   | 15  |
| Right Cingulate Gyrus anterior division          | 3   | 33  | 15  |
| Right Frontal Pole                               | 35  | 49  | 15  |
| Left Lateral Occipital Cortex superior division  | -61 | -95 | 31  |
| Right Occipital Pole                             | 3   | -95 | 31  |
| Left Cuneal Cortex                               | -13 | -79 | 31  |
| Right Cuneal Cortex                              | 19  | -79 | 31  |
| Left Lateral Occipital Cortex superior division  | -45 | -63 | 31  |
| Right Lateral Occipital Cortex superior division | 51  | -63 | 31  |
| Left Cerebral White Matter                       | -13 | -31 | 31  |
| Left Cerebral White Matter                       | -13 | -15 | 31  |
| Right Middle Frontal Gyrus                       | 51  | 33  | 31  |
| Right Frontal Pole                               | 35  | 49  | 31  |
| Right Inferior Frontal Gyrus pars triangularis   | 51  | 49  | 31  |
| Left Lateral Occipital Cortex superior division  | -45 | -95 | 47  |
| Right Lateral Occipital Cortex superior division | 51  | -95 | 47  |
| Left Lateral Occipital Cortex superior division  | -61 | -79 | 47  |
| Left Supramarginal Gyrus anterior division       | -61 | -31 | 47  |
| Left Postcentral Gyrus                           | -61 | -15 | 47  |
| Right Postcentral Gyrus                          | 51  | -15 | 47  |
| Right Middle Frontal Gyrus                       | 35  | 1   | 47  |
| Right Middle Frontal Gyrus                       | 51  | 17  | 47  |

Part 2.

| Region                                           | X   | Y   | Z  |
|--------------------------------------------------|-----|-----|----|
| Left Lateral Occipital Cortex superior division  | -29 | -95 | 63 |
| Right Lateral Occipital Cortex superior division | 51  | -79 | 63 |
| Left Supramarginal Gyrus posterior division      | -61 | -63 | 63 |
| Left Postcentral Gyrus                           | -13 | -47 | 63 |
| Left Postcentral Gyrus                           | -61 | -15 | 63 |
| Right Precentral Gyrus                           | 35  | -15 | 63 |
| Left Middle Frontal Gyrus                        | -61 | 17  | 63 |
| Right Superior Frontal Gyrus                     | 3   | 17  | 63 |
| Left Middle Frontal Gyrus                        | -45 | 33  | 63 |
