# Supplementary material for: Using Functional or Structural Magnetic Resonance Images and Personal Characteristic Data to Identify ADHD and Autism
Source: PubMed Central journal article supplement (PMC5193362; doi:10.1371/journal.pone.0166934), 2016-12-28
Supplement: pone.0166934.s013.pdf [file pone.0166934.s013.pdf]

**S10 Table. Block regions for ABIDE functional image data. Part 1**

| Region                                           | X   | Y   | Z   |
|--------------------------------------------------|-----|-----|-----|
| Right Cerebellum Crus II                         | 19  | -79 | -33 |
| Left Cerebellum Crus I                           | -45 | -63 | -33 |
| Left Inferior Temporal Gyrus posterior division  | -61 | -31 | -33 |
| Right Cerebellum VI                              | 35  | -31 | -33 |
| Left Temporal Pole                               | -61 | 17  | -33 |
| Left Frontal Orbital Cortex                      | -29 | 33  | -33 |
| Vermis Cerebellum VI                             | 3   | -79 | -17 |
| Right Cerebellum VI                              | 35  | -63 | -17 |
| Right Lateral Occipital Cortex inferior division | 51  | -63 | -17 |
| Right Superior Temporal Gyrus anterior division  | 51  | 1   | -17 |
| Left Frontal Orbital Cortex                      | -45 | 33  | -17 |
| Right Frontal Pole                               | 35  | 49  | -17 |
| Left Occipital Pole                              | -13 | -95 | -1  |
| Left Lingual Gyrus                               | -13 | -79 | -1  |
| Right Thalamus                                   | 19  | -31 | -1  |
| Right Superior Temporal Gyrus posterior division | 51  | -31 | -1  |
| Left Heschl's Gyrus (includes H1 and H2)         | -45 | -15 | -1  |
| Right Thalamus                                   | 3   | -15 | -1  |
| Right Planum Polare                              | 51  | 1   | -1  |
| Left Inferior Frontal Gyrus pars triangularis    | -61 | 33  | -1  |
| Left Inferior Frontal Gyrus pars triangularis    | -45 | 33  | -1  |
| Right Inferior Frontal Gyrus pars triangularis   | 35  | 33  | -1  |
| Left Intracalcarine Cortex                       | -13 | -79 | 15  |
| Right Cerebral White Matter                      | 3   | 17  | 15  |
| Right Cerebral White Matter                      | 19  | 17  | 15  |
| Right Cerebral White Matter                      | 19  | 33  | 15  |
| Right Frontal Pole                               | 19  | 49  | 15  |
| Right Occipital Pole                             | 19  | -95 | 31  |
| Left Lateral Occipital Cortex superior division  | -29 | -63 | 31  |
| Left Cerebral White Matter                       | -29 | -31 | 31  |
| Right Cerebral White Matter                      | 19  | -31 | 31  |
| Left Precentral Gyrus                            | -29 | 1   | 31  |
| Right Precentral Gyrus                           | 51  | 1   | 31  |
| Right Cerebral White Matter                      | 19  | 17  | 31  |
| Left Lateral Occipital Cortex superior division  | -13 | -79 | 47  |
| Right Cingulate Gyrus posterior division         | 3   | -15 | 47  |
| Right Juxtapositional Lobule Cortex              | 3   | 1   | 47  |
| Right Middle Frontal Gyrus                       | 35  | 17  | 47  |
| Right Middle Frontal Gyrus                       | 51  | 17  | 47  |
| Right Superior Frontal Gyrus                     | 19  | 33  | 47  |
| Right Frontal Pole                               | 19  | 49  | 47  |
| Left Lateral Occipital Cortex superior division  | -29 | -63 | 63  |
| Right Precentral Gyrus                           | 19  | -15 | 63  |
| Right Precentral Gyrus                           | 35  | -15 | 63  |
